# Supplementary material
Source: HighWire-hosted journal article supplement (https://erj.ersjournals.com/content/57/4/2003841)
Supplement: inline-supplementary-material-1 [file inline-supplementary-material-1.pdf]

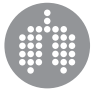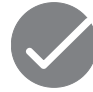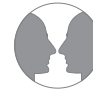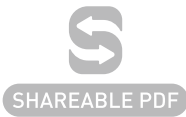

# Intrapulmonary shunt measured by bedside pulse oximetry predicts worse outcomes in severe COVID-19

Aleksandra Kotwica<sup>1,4</sup>, Harry Knights<sup>1,4</sup>, Nikhil Mayor <sup>1,4</sup>, Emma Russell-Jones<sup>2</sup>, Theodore Dassios<sup>2,5</sup> and David Russell-Jones<sup>3,5</sup>

**Affiliations:** <sup>1</sup>Royal Surrey NHS Foundation Trust, Guildford, UK. <sup>2</sup>King's College Hospital London, London, UK. <sup>3</sup>Royal Surrey NHS Foundation Trust and University of Surrey, Guildford, UK. <sup>4</sup>Co-first authors. <sup>5</sup>Co-last authors.

**Correspondence:** David Russell-Jones, Royal Surrey NHS Foundation Trust and University of Surrey, Cedar Centre, Egerton Road, Guildford, GU2 7XX, UK. E-mail: davidrussell-jones@nhs.net

 @ERSpublications  
**Using simple bedside pulse oximetry to create oxygen-haemoglobin desaturation curves may be useful in triaging patients with COVID-19. Intrapulmonary shunting is associated with worse outcomes in COVID-19, and the degree of shunt may predict outcomes.** <https://bit.ly/2KVv0m2>

**Cite this article as:** Kotwica A, Knights H, Mayor N, *et al.* Intrapulmonary shunt measured by bedside pulse oximetry predicts worse outcomes in severe COVID-19. *Eur Respir J* 2021; 57: 2003841 [<https://doi.org/10.1183/13993003.03841-2020>].

This single-page version can be shared freely online.

## To the Editor:

Hypoxaemia is a key indicator for hospital admission with coronavirus disease 2019 (COVID-19) [1, 2]. Controversy surrounds the pathophysiology underlying hypoxaemia, with intrapulmonary shunt, mismatch in ventilation-to-perfusion ( $V_A/Q'$ ) ratio, endothelial injury, microvascular coagulation and host inflammatory response hypothesised to play a role [3–6]. It has recently been proposed that COVID-19 pneumonia may exist as two phenotypes dependent on the preservation of lung mechanics and the relative contribution of  $V_A/Q'$  mismatch and intrapulmonary shunting to hypoxaemia [7]. We hypothesised that  $V_A/Q'$  mismatch and intrapulmonary shunting are present in COVID-19 pneumonia and aimed to assess their effect on outcome. A mathematical model was used to construct oxygen-haemoglobin dissociation curves (ODC) [8] to determine the degree of shunt and  $V_A/Q'$  mismatch in a cohort of patients with severe COVID-19. Factors contributing to shunt and mortality were identified.
